# Supplementary material
Source: MDPI journal article supplement (https://www.mdpi.com/2071-1050/14/10/5867)
Supplement: s1 [file s1]

**Questionnaire**  
**Sustainable strategies of STD regarding Covid-19**

**General questions**

| Question                                                                                                     | YES | NO |
|--------------------------------------------------------------------------------------------------------------|-----|----|
| Do you consider sustainability a priority in the recovery of your destination?                               |     |    |
| Do you think that being a smart destination has increased your preparedness for crises like the current one? |     |    |

| Question                                                                                                                                                                                                                                 | Answer |
|------------------------------------------------------------------------------------------------------------------------------------------------------------------------------------------------------------------------------------------|--------|
| <p>Since the beginning of the pandemic, your destination strategy has been mainly focused on:</p> <ul style="list-style-type: none"> <li>- Promotion</li> <li>- Health and safety</li> <li>- Financial assistance and support</li> </ul> |        |
| Have you carried out specific promotional actions for the recovery of your destination, and if yes, please indicate which ones?                                                                                                          |        |
| Have you increased these actions compared to other years?                                                                                                                                                                                |        |
| Please rate from 1 to 5 the success of the actions you have carried out.                                                                                                                                                                 |        |

## Questions about each sustainable axis

| <b>Economic protection measures</b><br>(Promoted and disseminated by the local authority in charge of managing the destination) | <b>YES</b> | <b>NO</b> |
|---------------------------------------------------------------------------------------------------------------------------------|------------|-----------|
| <b>Direct aid/actions for the hospitality sector</b>                                                                            |            |           |
| Measures in favour of tourism entrepreneurship                                                                                  |            |           |
| Exemption of special taxes (tables on public ground)                                                                            |            |           |
| Exemption of other taxes                                                                                                        |            |           |
| Promotional campaigns to stimulate consumption in the sector                                                                    |            |           |
| Other initiatives                                                                                                               |            |           |
| <b>Direct aid/actions for unemployed staff in the tourism sector</b>                                                            |            |           |
| Training offer for affected employees                                                                                           |            |           |
| Hiring of affected employees                                                                                                    |            |           |
| Actions to maintain employment                                                                                                  |            |           |
| <b>Aid/actions for sectors with a tourism impact</b>                                                                            |            |           |
| Support for cultural and leisure enterprises                                                                                    |            |           |
| Support for souvenir companies, active tourism activities, tourist guides...                                                    |            |           |

| <b>Environmental protection measures</b><br>(Promoted and distributed by the local entity in charge of the management of the destination) | <b>YES</b> | <b>NO</b> |
|-------------------------------------------------------------------------------------------------------------------------------------------|------------|-----------|
| Control of carrying capacity                                                                                                              |            |           |
| Measurement of air quality                                                                                                                |            |           |
| Protection of the natural environment as a result of the preference for visiting safe natural environments (overload control)             |            |           |

|                                                                              |  |  |
|------------------------------------------------------------------------------|--|--|
| Non-aggressive disinfection of the medium                                    |  |  |
| Use of new technologies for: counting, parking area, capacity, transit, etc. |  |  |

| <b>Sociocultural protection measures</b><br>(Promoted and distributed by the local authority in charge of managing the destination)                                                                                                                                                                                                                       | <b>YES</b> | <b>NO</b> |
|-----------------------------------------------------------------------------------------------------------------------------------------------------------------------------------------------------------------------------------------------------------------------------------------------------------------------------------------------------------|------------|-----------|
| <b>Sociocultural actions</b>                                                                                                                                                                                                                                                                                                                              |            |           |
| Organization of events/activities                                                                                                                                                                                                                                                                                                                         |            |           |
| Adaptation of cultural and leisure offer to health protocols                                                                                                                                                                                                                                                                                              |            |           |
| Provision of minimum cultural services                                                                                                                                                                                                                                                                                                                    |            |           |
| <b>Public health actions</b>                                                                                                                                                                                                                                                                                                                              |            |           |
| Specific health actions                                                                                                                                                                                                                                                                                                                                   |            |           |
| Collaboration with health workers                                                                                                                                                                                                                                                                                                                         |            |           |
| Dissemination/safety information/protocol to avoid Covid-19                                                                                                                                                                                                                                                                                               |            |           |
| <b>Heritage protection actions</b>                                                                                                                                                                                                                                                                                                                        |            |           |
| Actions to maintain accessibility to the main heritage/cultural resources.                                                                                                                                                                                                                                                                                |            |           |
| <b>Cohesion actions</b>                                                                                                                                                                                                                                                                                                                                   |            |           |
| Involvement of the population/civil associations in possible formulas for the recovery of the destination.<br><br><i>(this action should actually be included in the Governance axis, but I thought it would be interesting to include it here so that it also provides information on the participation of the population in the current situation).</i> |            |           |
